# Supplementary material for: Multi-parametric MRI Radiomics Predicts Different HER2 Expression in Breast Cancer
Source: Research Square preprint supplement (doi:10.21203/rs.3.rs-6646001/v1), 2025-05-19
Supplement: Supplementary file 1 [file 41194aff4b369c84e7e2e516.docx]

**TABLE S1 Scanning Parameters of T2WI, IVIM and DCE-MRI**

| Parameters | 3.0T GE | | | 3.0T Philips | | |
| --- | --- | --- | --- | --- | --- | --- |
| T2WI | IVIM | DCE-MRI | T2WI | IVIM | DCE-MRI |
| TR(ms) | 4160 | 5625 | 3.9 | 1500 | 5884 | 3.6 |
| TE(ms) | 74.2 | 86.5 | 2.1 | 184 | 87 | 1.91 |
| FOV(mm2) | 320×320 | 320×320 | 320×320 | 400×400 | 320×260 | 240×340 |
| Thickness (mm) | 5.0 | 5.0 | 4.4 | 1.5 | 4 | 4.0 |
| Voxel | 1.1×1.3×5 | 2.5×2.5×5 | 1.25×1.88×4.4 | 1×1.2×1.5 | 3×3×4 | 1×1.2×4 |
| Scanning time(s) | 293 | 225 | 482 | 162 | 335 | 408 |

**TABLE S2 Comparison of Clinical Pathological and Conventional Imaging Features between Training Cohort and Validation Cohort**

| Variables | Training cohort (n=158) | | Validation cohort (n=69) | *P* |
| --- | --- | --- | --- | --- |
| **Age** | | 49±9 | 50±10 | 0.761 |
| **HR status** | |  |  | 0.477 |
| Positive | | 124(78.5) | 57(82.6) |  |
| Negative | | 34(21.5) | 12(17.4) |  |
| **Ki-67 expression** | | | | 0.186 |
| <20% | | 27(17.1) | 17(24.6) |  |
| ≥20% | | 131(82.9) | 52(75.4) |  |
| **ALN** | | | | 0.920 |
| Absent | | 79(50.0) | 34(49.3) |  |
| Present | | 79(50.0) | 35(50.7) |  |
| **Histological grade** | |  |  | 0.009 |
| I-II | | 71(44.9) | 44(63.8) |  |
| III | | 87(55.1) | 25(36.2) |  |
| **Maximum diameter of lesion** | |  |  | 0.176 |
| ≤2cm | | 56(35.4) | 31(44.9) |  |
| >2cm | | 102(64.6) | 38(55.1) |  |
| **Intratumoral necrocystosis** | | | | 0.433 |
| Absent | | 85(53.8) | 41(59.4) |  |
| Present | | 73(46.2) | 28(40.6) |  |
| **Enhancement mode** | |  |  | 0.513 |
| Mass | | 132(83.5) | 60(87.0) |  |
| Non mass/Mass and Non mass | | 26(16.5) | 9(13.0) |  |
| **FGT** | | | | 0.709 |
| Fatty/Scattered | | 42(26.6) | 20(29.0) |  |
| Heterogeneous/Extreme | | 116(73.4) | 49(71.0) |  |
| **BPE** | | | | 0.538 |
| Minimal/Mild | | 146(92.4) | 66(95.7) |  |
| Moderate/Marked | | 12(7.6) | 3(4.3) |  |
| **TIC** | | | | 0.260 |
| I/II | | 100(63.3) | 49(71.0) |  |
| III | | 58(36.7) | 20(29.0) |  |
| **Peritumoral edema** | | | | 0.312 |
| Absent | | 116(73.4) | 55(79.7) |  |
| Present | | 42(26.6) | 14(20.3) |  |

Note: HR,hormone receptor; ALN,Axillary lymph node metastasis; FGT, amount of fibro glandular tissue; BPE, background parenchymal enhancement; TIC,time-signal intensity curve.

| **TABLE S3 Efficiency of Various Radiomic Models for Differentiating HER2 Positive and Negative Breast Cancer** | | | | |
| --- | --- | --- | --- | --- |
| Models | **Cohort** | AUC(95%CI) | Sensitivity | Specificity |
| DCE | Training | 0.769(0.696,0.833) | 0.853 | 0.600 |
| Validation | 0.736(0.616,0.835) | 0.478 | 0.957 |
| D | Training | 0.750(0.675,0.815) | 0.557 | 0.887 |
| Validation | 0.786(0.671,0.876) | 0.739 | 0.826 |
| D* | Training | 0.777(0.704,0.839) | 0.574 | 0.887 |
| Validation | 0.754(0.636,0.850) | 0.609 | 0.848 |
| f | Training | 0.772(0.699,0.835) | 0.574 | 0.923 |
| Validation | 0.770(0.653,0.863) | 0.696 | 0.804 |
| IVI（D+D*+f） | Training | 0.819(0.750,0.876) | 0.574 | 0.949 |
| Validation | 0.760(0.642,0.855) | 0.870 | 0.652 |
| DCE combined IVIM | Training | 0.866(0.803,0.915) | 0.672 | 0.928 |
| Validation | 0.751(0.633,0.848) | 0.739 | 0.717 |

| **TABLE S4 Delong Test Results of Various Radiomic Models for Distinguishing HER2 Positive and Negative Breast Cancer** | | |
| --- | --- | --- |
| Models | Training cohort | Validation cohort |
| DCE vs D | 0.57 | 0.36 |
| DCE vs D* | 0.85 | 0.81 |
| DCE vs f | 0.95 | 0.60 |
| D vs D* | 0.43 | 0.60 |
| D vs f | 0.54 | 0.76 |
| D*vs f | 0.85 | 0.62 |
| DCE vs IVIM | 0.26 | 0.77 |
| D vs IVIM | 0.03 | 0.68 |
| D* vs IVIM | 0.07 | 0.85 |
| f vs IVIM | 0.15 | 0.80 |
| DCE vs DCE combined IVIM | 0.005* | 0.82 |
| D vs DCE combined IVIM | 0.0003* | 0.54 |
| D* vs DCE combined IVIM | 0.001* | 0.94 |
| f vs DCE combined IVIM | 0.009* | 0.64 |
| IVIM vs DCE combined IVIM | 0.013* | 0.81 |

Note: Delong test results of all data in the table are *P* values.

**TABLE S5 Delong Test Results of Clinical Model, Radiomic Model and Clinical combined Radiomic Model for Differentiating HER2 Positive and Negative Breast Cancer**

| Models | Training cohort | Validation cohort |
| --- | --- | --- |
| Clinical model vs Radiomic model | 1.000 | 0.054 |
| Clinical model vs Clinic combined radiomic model | 0.0002* | 0.054 |
| Radiomic model vs Clinic combined radiomic model | 0.052 | 0.150 |

Note: Delong test results of all data in the table are *P* values.

**TABLE S6 Comparison of Clinical Pathological and Conventional Imaging Features between Training Cohort and Validation Cohort**

| **Variables** | Training cohort (n=100) | Validation cohort (n=43) | *P* |
| --- | --- | --- | --- |
| **Age** | 49±9 | 48±8 | 0.42 |
| **HR status** |  |  | 0.55 |
| Positive | 88(88.0) | 40(93.0) |  |
| Negative | 12(12.0) | 3(7.0) |  |
| **Ki-67 expression** | | | 0.50 |
| <20% | 27(27.0) | 14(32.6) |  |
| >20% | 73(73.0) | 29(67.4) |  |
| **ALN** | | | 0.72 |
| Absent | 59(59.0) | 24(55.8) |  |
| Present | 41(41.0) | 19(44.2) |  |
| **Histological grade** |  |  | 0.25 |
| I-II | 62(62.0) | 31(72.1) |  |
| III | 38(38.0) | 12(27.9) |  |
| **Maximum diameter of lesion** | | | 0.09 |
| ≤2cm | 55(55.0) | 17(39.5) |  |
| >2cm | 45(45.0) | 26(60.5) |  |
| **Intratumoral necrocystosis** | | | 0.45 |
| Absent | 56(56.0) | 27(62.8) |  |
| Present | 44(44.0) | 16(37.2) |  |
| **Enhancement mode** |  |  | 0.22 |
| Mass | 89(89.0) | 35(81.4) |  |
| Non mass/Mass and Non mass | 11(11.0) | 8(18.6) |  |
| **FGT** | | | 0.28 |
| Fatty/Scattered | 26(26.0) | 15(34.9) |  |
| Heterogeneous/Extreme | 74(74.0) | 28(65.1) |  |
| **BPE** | | | 0.71 |
| Minimal/Mild | 92(92.0) | 38(88.4) |  |
| Moderate/Marked | 8(8.0) | 5(11.6) |  |
| **TIC** | | | 0.74 |
| I/II | 68(68.0) | 28(65.1) |  |
| III | 32(32.0) | 15(34.9) |  |
| **Peritumoral edema** | | | 1.00 |
| Absent | 90(90.0) | 38(88.4) |  |
| Present | 10(10.0) | 5(11.6) |  |

Note: HR,hormone receptor; ALN,Axillary lymph node metastasis; FGT, amount of fibro glandular tissue; BPE, background parenchymal enhancement; TIC,time-signal intensity curve.

| **TABLE S7 Comparison of Clinical Pathological and Conventional Imaging Features of HER2 Low and Zero Breast Cancer** | | | | | | |
| --- | --- | --- | --- | --- | --- | --- |
| Variables | Training cohort (n=100) | | | Validation cohort (n=43) | | |
| HER2  low  (n=57) | HER2  zero  (n=43) | *P* | HER2  low  (n=25) | HER2  zero  (n=18) | *P* |
| **Age** | 50±9 | 47±10 | 0.10 | 49±8 | 46±8 | 0.19 |
| **HR status** | | | 0.003* |  |  | 0.77 |
| Positive | 55(96.5) | 33(76.7) |  | 24(96.0) | 16(88.9) |  |
| Negative | 2(3.5) | 10(23.3) |  | 1(4.0) | 2(11.1) |  |
| **Ki-67 expression** | | | 0.011* |  |  | 0.93 |
| <20% | 21(36.8) | 6(14.0) |  | 8(32.0) | 6(33.3) |  |
| ≥20% | 36(63.2) | 37(86.0) |  | 17(68.0) | 12(66.7) |  |
| **ALN** | | | 0.14 |  |  | 0.98 |
| Absent | 30(52.6) | 29(67.4) |  | 14(56.0) | 10(55.6) |  |
| Present | 27(47.4) | 14(32.6) |  | 11(44.0) | 8(44.4) |  |
| **Histological grade** | | | 0.001* |  |  | 0.17 |
| I-II | 43(75.4) | 19(44.2) |  | 20(80.0) | 11(61.1) |  |
| III | 14(24.6) | 24(55.8) |  | 5(20.0) | 7(38.9) |  |
| **maximum diameter of lesion** | | | 0.34 |  |  | 0.94 |
| ≤2cm | 29(50.9) | 26(60.5) |  | 10(40.0) | 7(38.9) |  |
| >2cm | 28(49.1) | 17(39.5) |  | 15(60.0) | 11(61.1) |  |
| **Intratumoral necrocystosis** | | | 0.10 |  |  | 0.28 |
| Absent | 36(63.2) | 20(46.5) |  | 14(56.0) | 13(72.2) |  |
| Present | 21(36.8) | 23(53.5) |  | 11(44.0) | 5(27.8) |  |
| **Enhancement mode** | | | 0.15 |  |  | 1.00 |
| Mass | 48(84.2) | 41(95.3) |  | 20(80.0) | 15(89.1) |  |
| **Non mass/Mass and Non mass** | 9(15.8) | 2(4.7) |  | 5(20.0) | 3(10.9) |  |
| **FGT** | | | 0.08 |  |  | 0.03 |
| Fatty/Scattered | 11(19.3) | 15(34.9) |  | 12(48.0) | 3(16.7) |  |
| Heterogeneous/Extreme | 46(80.7) | 28(65.1) |  | 13(52.0) | 15(83.3) |  |
| **BPE** | | | 0.96 |  |  | 1.00 |
| Minimal/Mild | 53(93.0) | 39(90.7) |  | 22(88.0) | 16(88.9) |  |
| Moderate/Marked | 4(7.0) | 4(9.3) |  | 3(12.0) | 2(11.1) |  |
| **TIC** |  |  | 0.92 |  |  | 0.41 |
| I/II | 39(68.4) | 29(67.4) |  | 15(60.0) | 13(72.2) |  |
| III | 18(31.6) | 14(32.6) |  | 10(40.0) | 5(27.8) |  |
| **Peritumoral edema** |  |  | 0.89 |  |  | 0.18 |
| Absent | 52(91.2) | 38(88.4) |  | 24(96.0) | 14(77.8) |  |
| Present | 5(8.8) | 5(11.6) |  | 1(4.0) | 4(22.2) |  |

Note: HR,hormone receptor; ALN,Axillary lymph node metastasis; FGT, amount of fibro glandular tissue; BPE, background parenchymal enhancement; TIC,time-signal intensity curve.

**TABLE S8 Efficiency of Various Radiomic Models for Differentiating HER2 Low and Zero Breast Cancer**

| Models | Cohort | AUC(95%CI) | Sensitivity | Specificity |
| --- | --- | --- | --- | --- |
| DCE | Training | 0.894(0.817,0.947) | 0.877 | 0.791 |
| Validation | 0.789(0.638,0.898) | 1.000 | 0.611 |
| D | Training | 0.838(0.751,0.904) | 0.807 | 0.767 |
| Validation | 0.722(0.565,0.848) | 0.920 | 0.668 |
| D* | Training | 0.846(0.760,0.911) | 0.825 | 0.721 |
| Validation | 0.827(0.681,0.925) | 0.920 | 0.668 |
| f | Training | 0.829(0.741,0.897) | 0.965 | 0.605 |
| Validation | 0.800(0.650,0.906) | 1.000 | 0.668 |
| D+D*+f | Training | 0.929(0.859,0.970) | 0.877 | 0.861 |
| Validation | 0.816(0.668,0.917) | 1.000 | 0.668 |
| DCE combined IVIM | Training | 0.951(0.888,0.984) | 0.877 | 0.861 |
| Validation | 0.853(0.712,0.942) | 0.960 | 0.668 |

**TABLE S9 The Final Radiomic Features of Distinguishing HER2 Low Breast Cancer from HER2 Zero Breast Cancer**

| Models | Number of Radiomic Features | | Name of Radiomic Features |
| --- | --- | --- | --- |
| DCE | 7 | wavelet-HLL-glszm-GrayLevelNonUniformity  wavelet-LLH-firstorder-Range  wavelet-LLH-glcm-MCC  wavelet-HHL-firstorder-Kurtosis  wavelet-HLL-glszm-LowGrayLevelZoneEmphasis  wavelet-HLL-firstorder-Skewness  wavelet-HLL-glcm-ClusterShade | |
| D | 5 | wavelet-HHH-firstorder-InterquartileRange  wavelet-HHH-firstorder-Maximum  wavelet-HLH-firstorder-RobustMeanAbsoluteDeviation  wavelet-LLH-glcm-Correlation  wavelet-HLH-firstorder-Variance | |
| D* | 5 | wavelet-LHL-glcm-Idmn  original-glcm-Correlation  wavelet-LHL-glszm-GrayLevelVariance  wavelet-LHH-glrlm-ShortRunLowGrayLevelEmphasis  wavelet-HLL-ngtdm-Complexity | |
| f | 5 | wavelet-HHH-gldm-LargeDependenceEmphasis  wavelet-HLH-firstorder-Variance  wavelet-LLH-firstorder-Range  wavelet-HLL-gldm-SmallDependenceLowGrayLevelEmphasis  original-glszm-LargeAreaLowGrayLevelEmphasis | |

| **TABLE S10 Delong Test Results of Various Radiomic Models for Distinguishing HER2 Low and Zero Breast Cancer** | | |
| --- | --- | --- |
| Models | Training cohort | Validation cohort |
| DCE vs D | 0.203 | 0.361 |
| DCE vs D* | 0.237 | 0.577 |
| DCE vs f | 0.148 | 0.900 |
| D vs D* | 0.868 | 0.188 |
| D vs f | 0.838 | 0.400 |
| D*vs f | 0.739 | 0.769 |
| DCE vs IVIM | 0.303 | 0.738 |
| D vs IVIM | 0.008* | 0.229 |
| D*vs IVIM | 0.007* | 0.853 |
| f vs IVIM | 0.009* | 0.793 |
| DCE vs DCE combined IVIM | 0.032* | 0.262 |
| D vs DCE combined IVIM | 0.002* | 0.099 |
| D*vs DCE combined IVIM | 0.001* | 0.648 |
| f vs DCE combined IVIM | 0.002* | 0.368 |
| IVIM vs DCE combined IVIM | 0.078 | 0.367 |

Note: Delong test results of all data in the table are *P* values.
